# Supplementary material
Source: HighWire-hosted journal article supplement (doi:10.1101/rna.080149.124)

**Supplemental Fig. S1.** **Locations of conserved amino acids (replaced in mutagenesis experiments) in the PAZ domain of Aaeg Dcr2.** **(A)** Cartoon representation of the AlphaFold2 prediction (mean pLDDT score = 79.9) for the structure of WT Aaeg Dcr2 (GenBank ID: AAW48725), coloured according to predicted domains. **(B)** Enlarged representations of the Aaeg Dcr2 PAZ domain (purple, residues 824 – 942), rotated by 180°. Residues targeted in mutagenesis experiments are labelled (highlighted as red spheres).


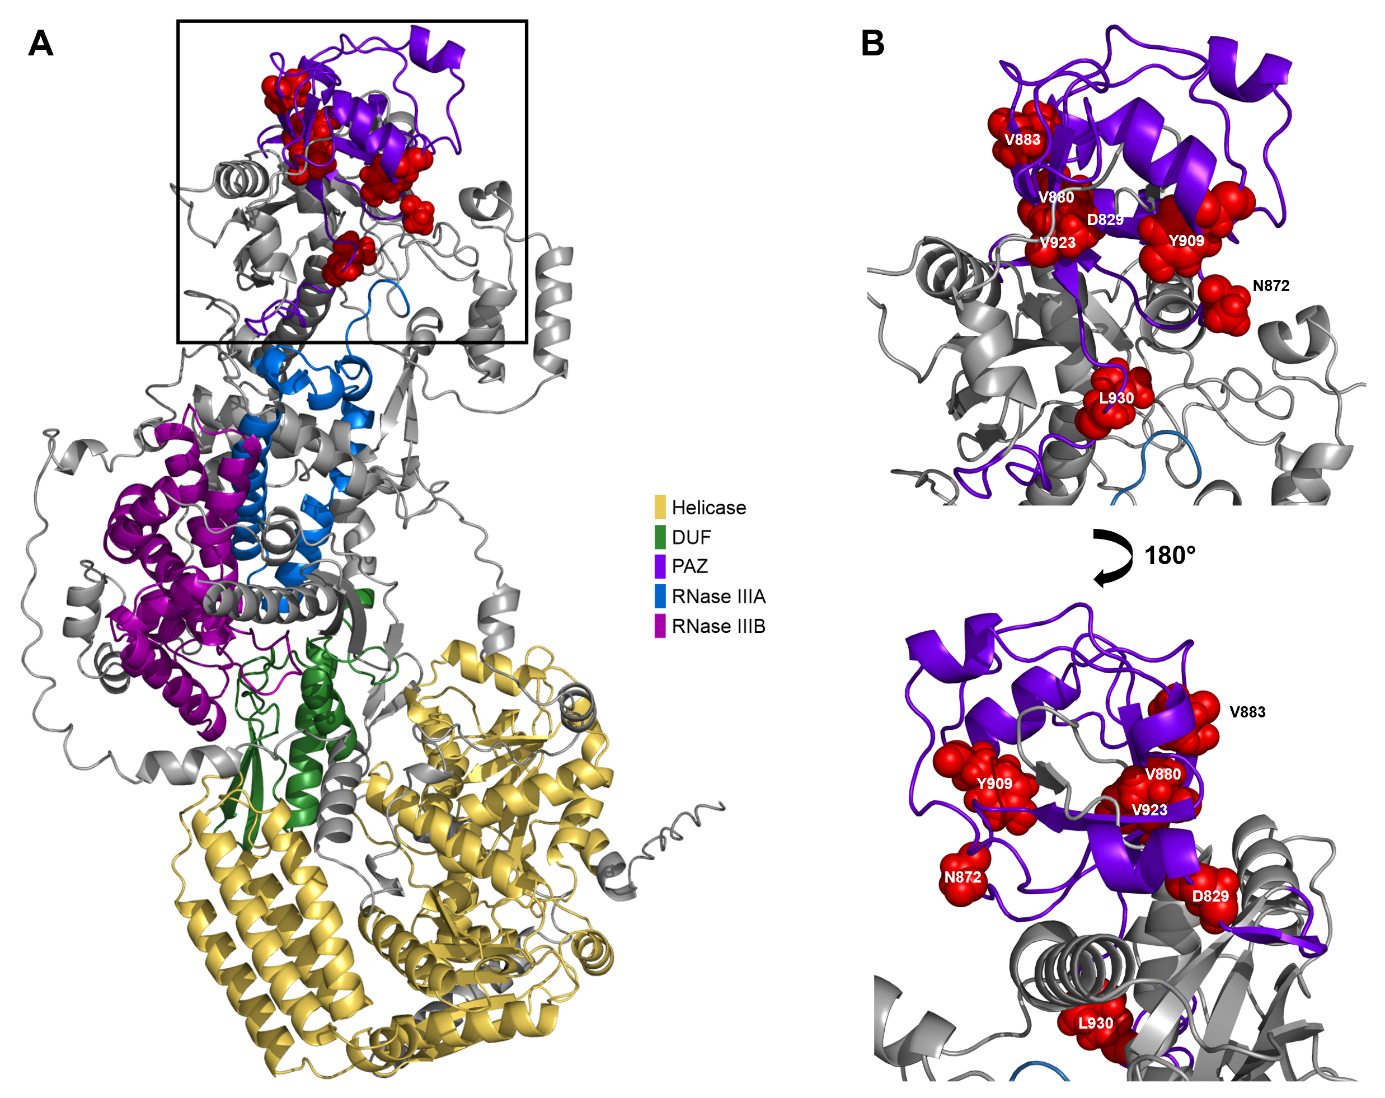

Supplement: Supplemental_Fig_S1.docx [file Supplemental_Fig_S1.docx]
