# Supplementary material
Source: HighWire-hosted journal article supplement (doi:10.1101/rna.080149.124)

**Supplemental Fig. S2.** **Assessment of (myc-tagged) Aaeg Dcr2 expression by western blot analysis**. AF319 cells were transfected with either pPUb plasmids expressing WT or PAZ domain mutant M1-M4 Dcr2, using pPUb-myc-eGFP as control. Anti-myc and anti-α tubulin (control) antibodies were used. Repeats 2 **(A)** and 3 **(B)** are shown.


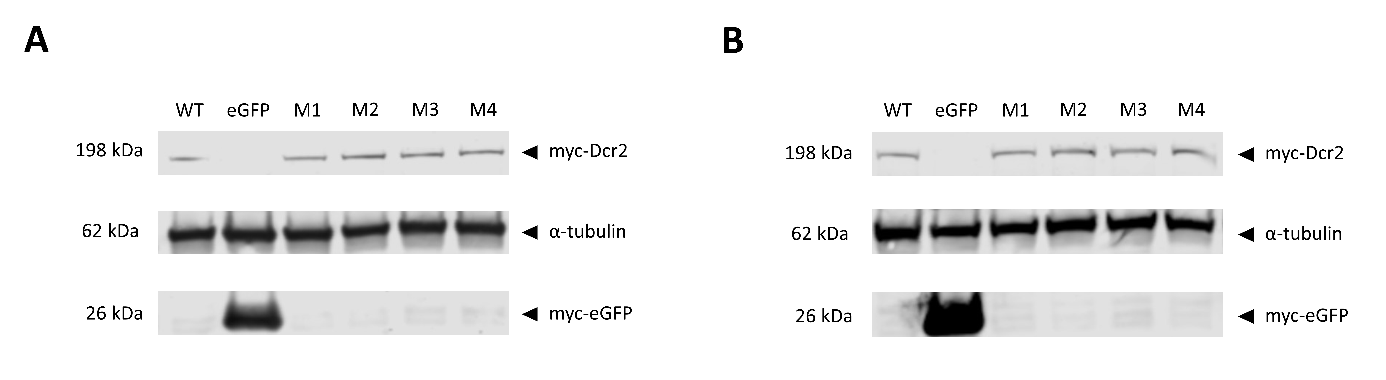

Supplement: Supplemental_Fig_S2.docx [file Supplemental_Fig_S2.docx]
