# Supplementary material
Source: HighWire-hosted journal article supplement (doi:10.1101/rna.080149.124)

**Supplemental Fig. S3.** **Size distribution of the raw small RNA sequencing data libraries and first position base bias.** Each treatment is the average of two independent sequencing runs; data is plotted as mean ± SD.
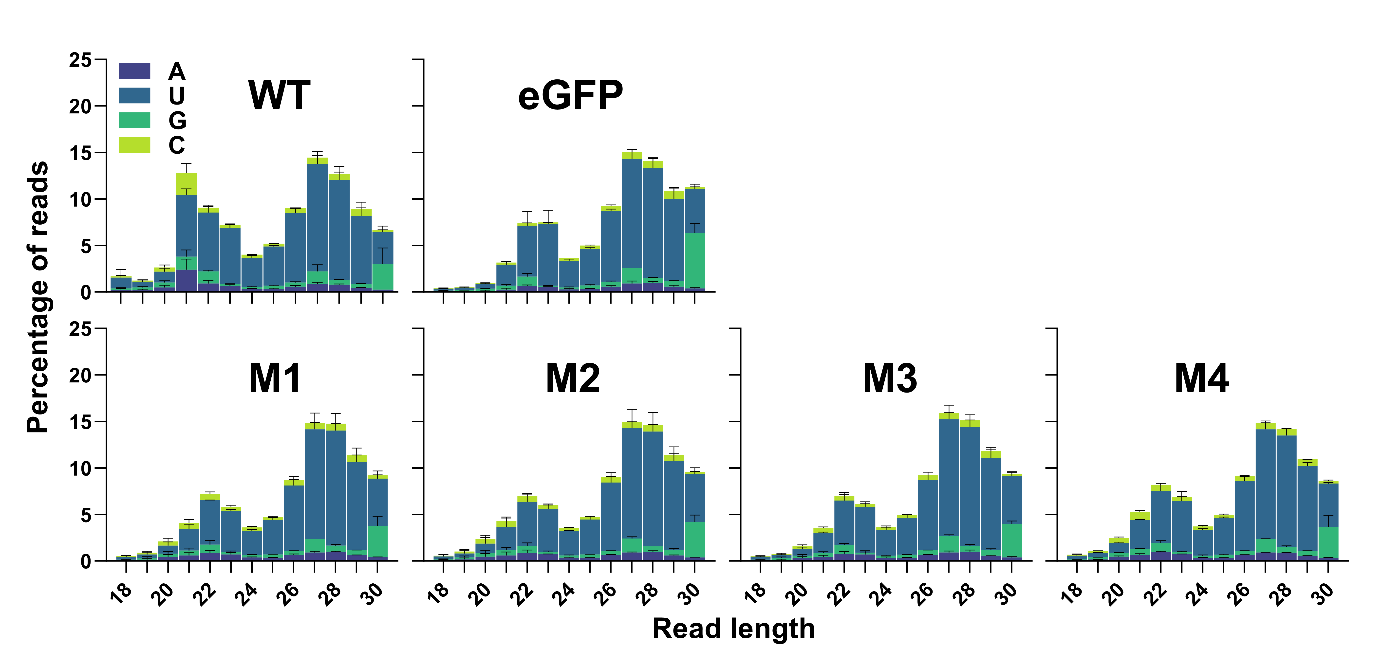

Supplement: Supplemental_Fig_S3.docx [file Supplemental_Fig_S3.docx]
