# Supplementary material
Source: HighWire-hosted journal article supplement (doi:10.1101/rna.080149.124)

**Supplemental Fig. S4.** ***Ae. aegypti* Dcr2 interactions with dsRNA in the active dicing state**.  Below, WT Dcr2.  Highly conserved residues in the WT Dcr2 PAZ domain have been highlighted. (A) Dcr2 structure bound with dsRNA. (B) Zoomed in view of panel A showing binding of dsRNA with the PAZ domain. (C, D, E) Panel B rotated at an angle of 90°, 180° or 270° respectively.


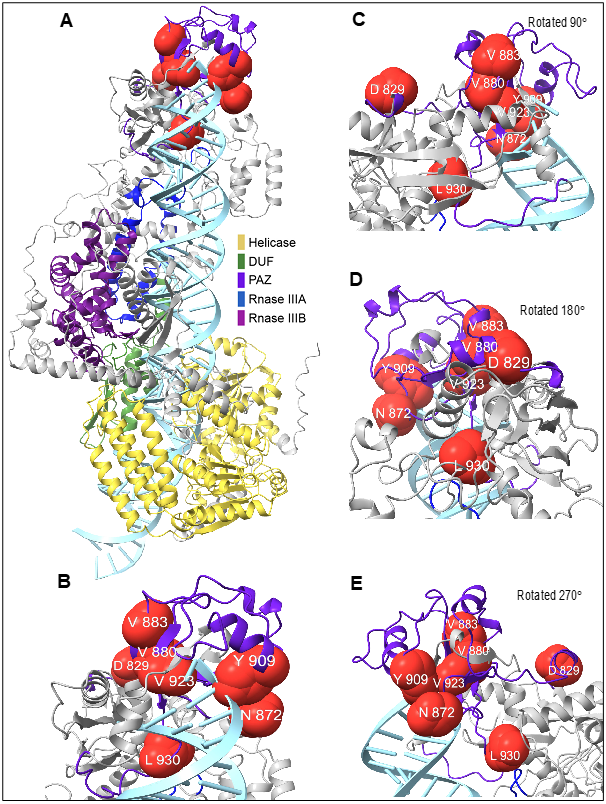


 Below*, Ae. aegypti* Dcr2 PAZ domain mutant M1 interactions with dsRNA in the active dicing state.  (A) Dcr2 structure bound with dsRNA. (B) Zoomed in view of panel A showing binding of dsRNA with the PAZ domain. (C, D, E) Panel B rotated at an angle of 90°, 180° or 270° respectively.


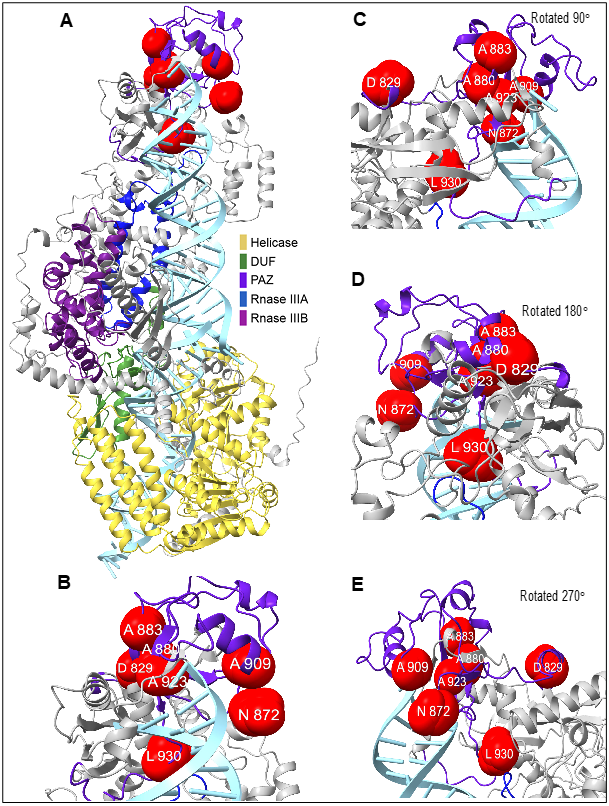


Below, *Ae. aegypti* Dcr2 PAZ domain mutant M2 interactions with dsRNA in the active dicing state. (A) Dcr2 structure bound with dsRNA. (B) Zoomed in view of panel A showing binding of dsRNA with the PAZ domain. (C, D, E) Panel B rotated at an angle of 90°, 180° or 270° respectively.


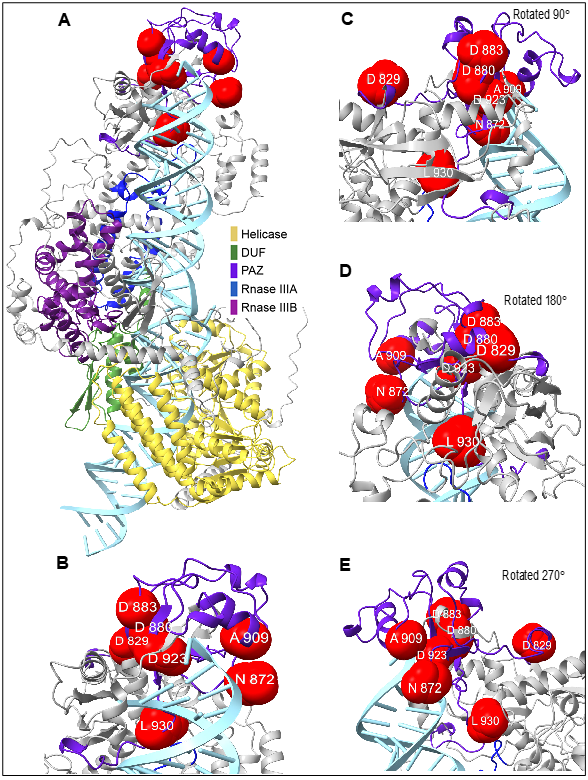


Below, *Ae. aegypti* Dcr2 PAZ domain mutant M3 interactions with dsRNA in the active dicing state.  (A) Dcr2 structure bound with dsRNA. (B) Zoomed in view of panel A showing binding of dsRNA with the PAZ domain. (C, D, E) Panel B rotated at an angle of 90°, 180° or 270° respectively.


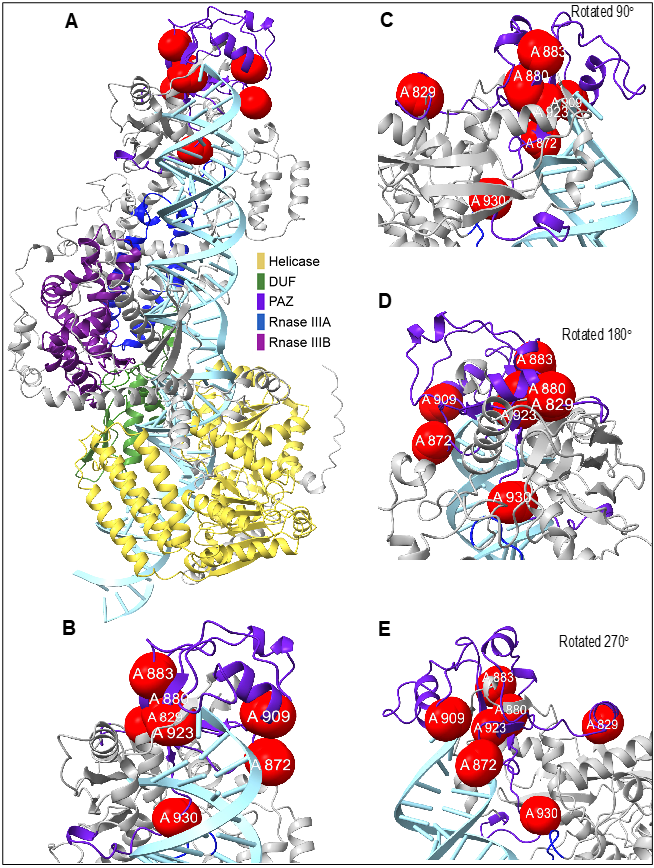


 Below, *Ae. aegypti* Dcr2 PAZ domain mutant M4 interactions with dsRNA during active dicing state.  (A) Dcr2 structure bound with dsRNA. (B) Zoomed in view of panel A showing binding of dsRNA with the PAZ domain. (C, D, E) Panel B rotated at an angle of 90°, 180° or 270° respectively.


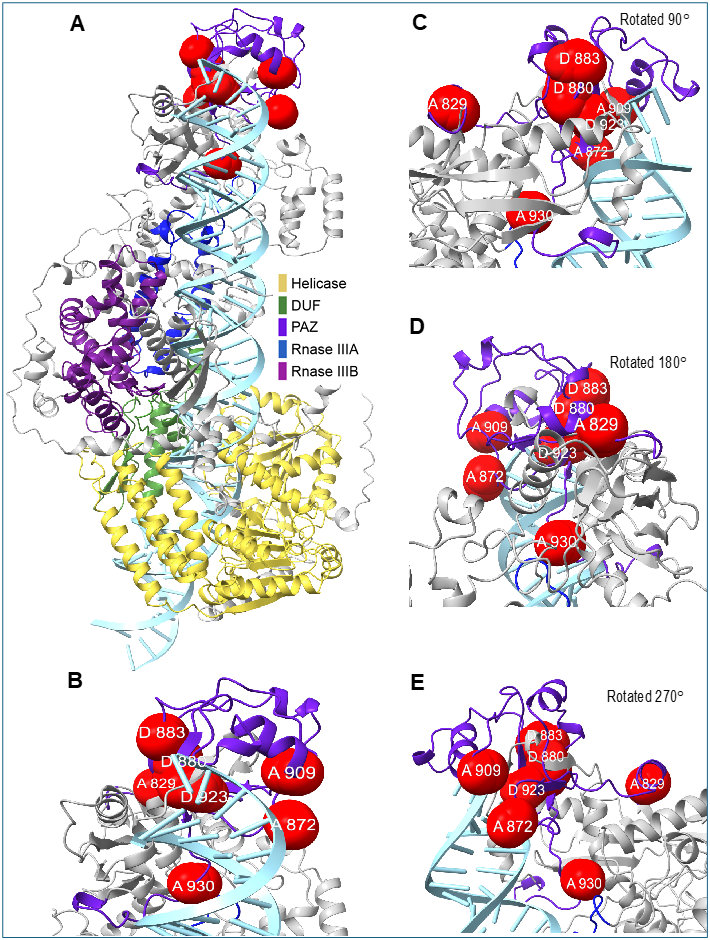

Supplement: Supplemental_Fig_S4.docx [file Supplemental_Fig_S4.docx]
