# Supplementary material
Source: HighWire-hosted journal article supplement (doi:10.1101/rna.080149.124)

**Supplemental Fig. S5. Frequency of overlapping pairs for 21 nt vsiRNAs produced in AF319 cells infected with SFV transiently overexpressing Aaeg WT Dcr2 or Dcr2 PAZ domain mutants M1-M4, or eGFP.** The probability z-scores of 21nt reads overlapping with 21nt pairs WT Dcr2, or Dcr2 PAZ domain mutant M1-M4 or eGFP (control) from 2 independent repeats. As a control for the influence of Ago2 on the „sharpness“ of overlapping pair frequency at 19 nt, a similar analysis was carried out on 21 nt vsiRNAs derived from AF525 Ago2 KO cells infected with SFV, and their parent AF5 cell line (also a parent of AF319 Dcr2 KO cells used in this study) (see Scherer et al., 2021) Data derived from (BioProject PRJNA734154). The highlighted region in yellow corresponds to the underrepresentation of overlapping pairs of 21 nt at 9 nt, corresponding to Ago2 slicer activity.


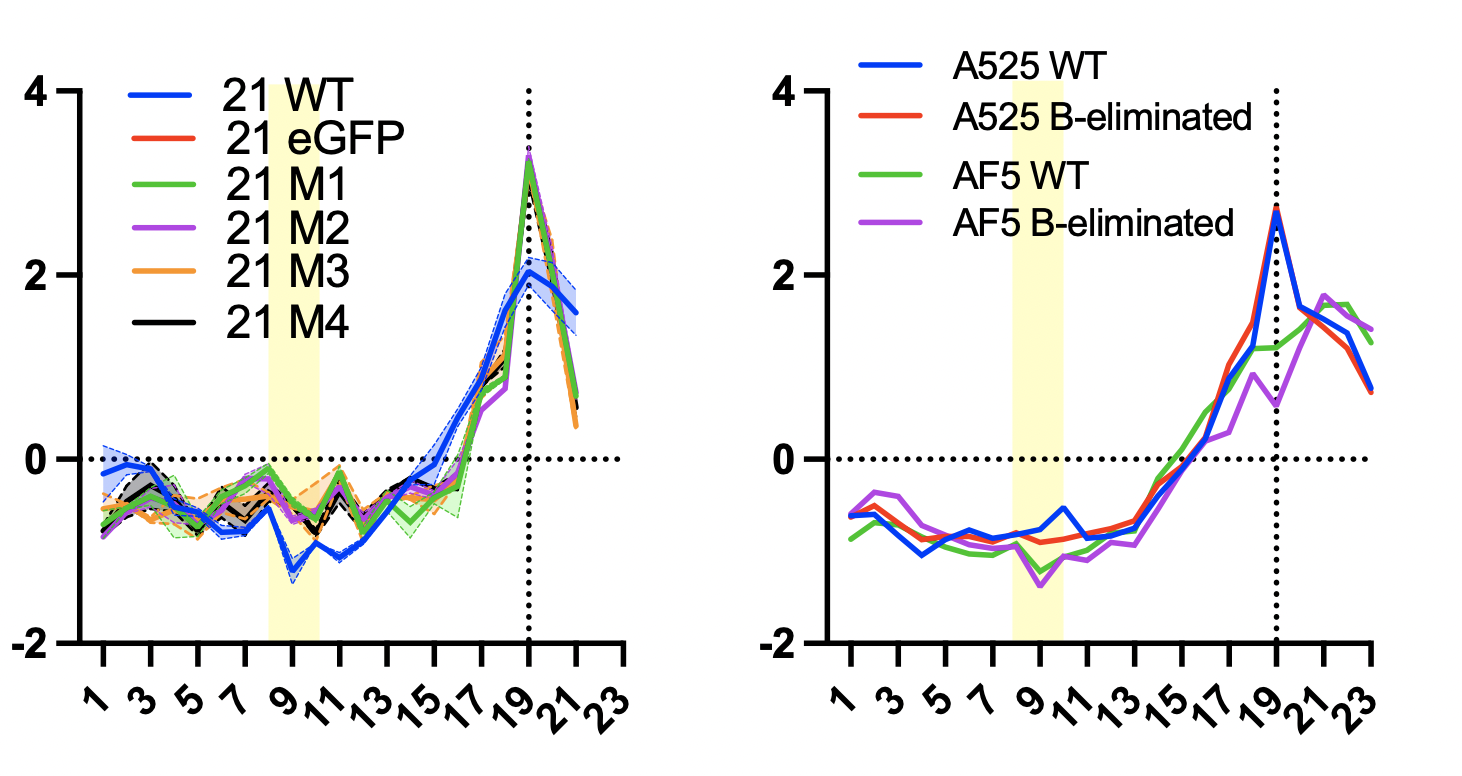

Supplement: Supplemental_Fig_S5.docx [file Supplemental_Fig_S5.docx]
