# Supplementary material
Source: HighWire-hosted journal article supplement (doi:10.1101/rna.080149.124)
Supplement: Supplemental_Table_S1.docx [file Supplemental_Table_S1.docx]

**Supplemental Table S1. Sequences of insect Dcr2 used for multiple sequence alignment, and corresponding accession numbers**.

| **Sequence** | **GenBank ID** |
| --- | --- |
| *Ae. aegypti* Dcr2 | AAW48725 |
| *Ae. aegypti* Ben haplotype 3 Dcr2 | MW924847 |
| *Ae. aegypti* Ben haplotype 11 Dcr2 | MW924848 |
| *Ae. aegypti* Cay haplotype 1 Dcr2 | MW924849 |
| *Ae. aegypti* Cay haplotype 3 Dcr2 | MW924850 |
| *Ae. aegypti* Cay haplotype 4 Dcr2 | MW924851 |
| *Ae. aegypti* Guad haplotype 2 Dcr2 | MW924852 |
| *Ae. aegypti* Guad haplotype 3 Dcr2 | MW924853 |
| *Ae. aegypti* Guad haplotype 4 Dcr2 | MW924854 |
| *Ae. aegypti* KC haplotype 6 Dcr2 | MW924855 |
| *Ae. aegypti* Lope haplotype 7 Dcr2 | MW924856 |
| *Ae. aegypti* Lope haplotype 9 Dcr2 | MW924857 |
| *Ae. aegypti* Rat haplotype 1 Dcr2 | MW924858 |
| *Ae. aegypti* Rat haplotype 2 Dcr2 | MW924859 |
| *Ae. albopictus* Foshan Dcr2 | NP_001339903 |
| *An. bellator* Dcr2 | XP_058065464.1 |
| *An. coustani* Dcr2 | XP_058129328.1 |
| *An. gambiae* Dcr2 | XP_061515945.1 |
| *An. ziemanni* Dcr2 | XP_058171773.1 |
| *Cx. pipiens pallens* Dcr2 | XP_039447199.1 |
| *Cx. pipiens pipiens* Dcr2 | KAL1399066.1 |
| *Cx. quinquefasciatus* Dcr2 | EDS34500.1 |
| *Cx. tarsalis* Dcr2 | JAV25036.1 |
| *D. melanogaster* Dcr2 | NP_523778 |
