# Supplementary material
Source: HighWire-hosted journal article supplement (doi:10.1101/rna.080149.124)
Supplement: Supplemental_Table_S2.docx [file Supplemental_Table_S2.docx]

**Supplemental Table S2. Sequencing and library statistics for small RNA (size range 18-44 nt) used in this study.**

| **SRA accession** | **Treatment** | **RNA processing** | **Biological**  **Replicate** | **Number of reads** | **Mapped to SFV4** | **Mapping (%)** |
| --- | --- | --- | --- | --- | --- | --- |
| SRR25991932 | WT | Small RNA | 1 | 18926248 | 1263262 | 6.67 |
| SRR25991931 | eGFP | Small RNA | 1 | 17267077 | 915097 | 5.3 |
| SRR25991920 | M1 | Small RNA | 1 | 12680370 | 847773 | 6.69 |
| SRR25991919 | M2 | Small RNA | 1 | 12610095 | 974338 | 7.73 |
| SRR25991918 | M3 | Small RNA | 1 | 12589012 | 959948 | 7.63 |
| SRR25991917 | M4 | Small RNA | 1 | 12611645 | 969496 | 7.69 |
| SRR25991916 | WT | Small RNA | 2 | 12605922 | 617141 | 4.9 |
| SRR25991915 | eGFP | Small RNA | 2 | 12593587 | 620833 | 4.93 |
| SRR25991914 | M1 | Small RNA | 2 | 12680683 | 1004670 | 7.92 |
| SRR25991913 | M2 | Small RNA | 2 | 12726205 | 930982 | 7.32 |
| SRR25991930 | M3 | Small RNA | 2 | 12690952 | 817079 | 6.44 |
| SRR25991929 | M4 | Small RNA | 2 | 12599087 | 837500 | 6.65 |
